# Supplementary material for: Temporal trends of hospitalizations, comorbidity burden and in-hospital outcomes in patients admitted with asthma in the United States: Population-based study
Source: PLOS journal article supplement (doi:10.1371/journal.pone.0276731), 2022-12-14
Supplement: S9 (10.1371/journal.pone.0276731.s009) [file journal.pone.0276731.s009]

**S3 Fig. Assessment of asthma admissions before and after the ICD code switch by calendar quarters 2012-2017**

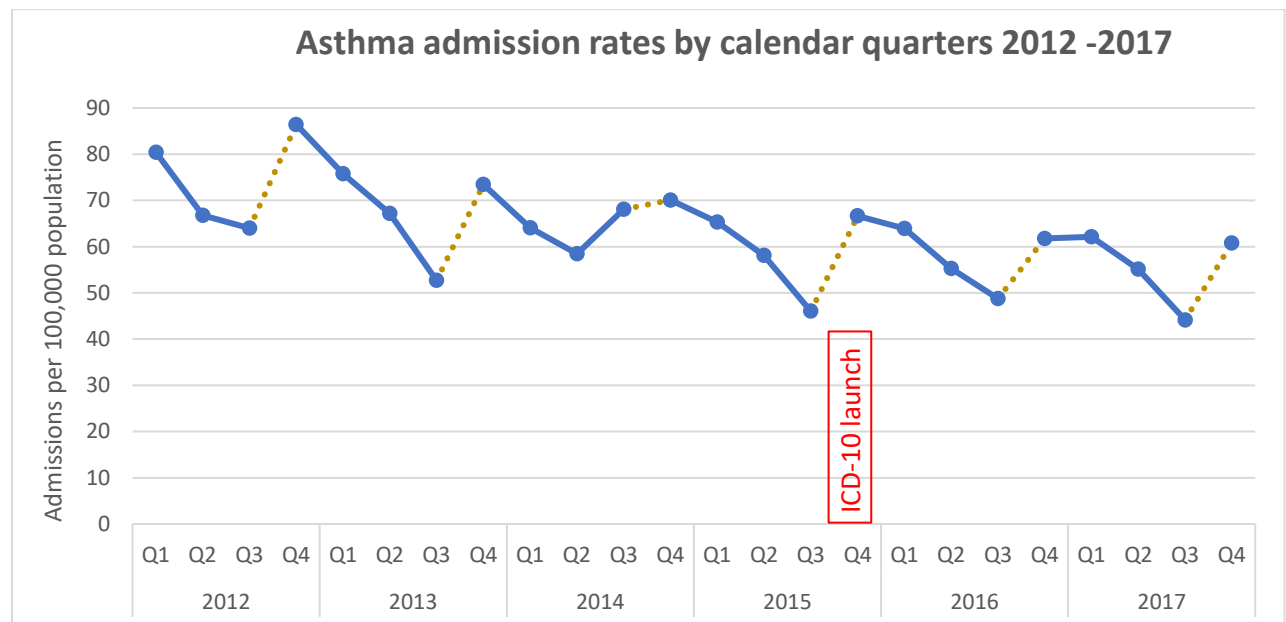

We observe an increase in admissions from 46 to 66.6/100,000 population following the code switch in October 2015. When further explored, we found that the **increase in admissions rate between Q3 and Q4** seems consistent in years before and after the code switch i.e. it appears to be unrelated to the code change from Q4 in 2015 (**dashed lines**). As reported in the paper, asthma admissions were overall higher during fall and winter (October-March), which is in line with previous literature attributing this to higher prevalence of respiratory infections and proneness to indoor air pollutants.
